# Supplementary material
Source: Springer Nature journal article supplement (https://www.springermedizin.de/resource/supplementary/12913_2011_1817_MOESM2_ESM.pdf/9529040)
Supplement: MOESM2 [file 9529040]

## Macro-system level

Framework for describing macro-level context and how this influences the organisational management of quality in hospitals in each country:

- healthcare context
- funding and access
- regulatory framework
- accreditation and monitoring
- information availability
- resources available
- patient rights

## Meso- and micro-system levels

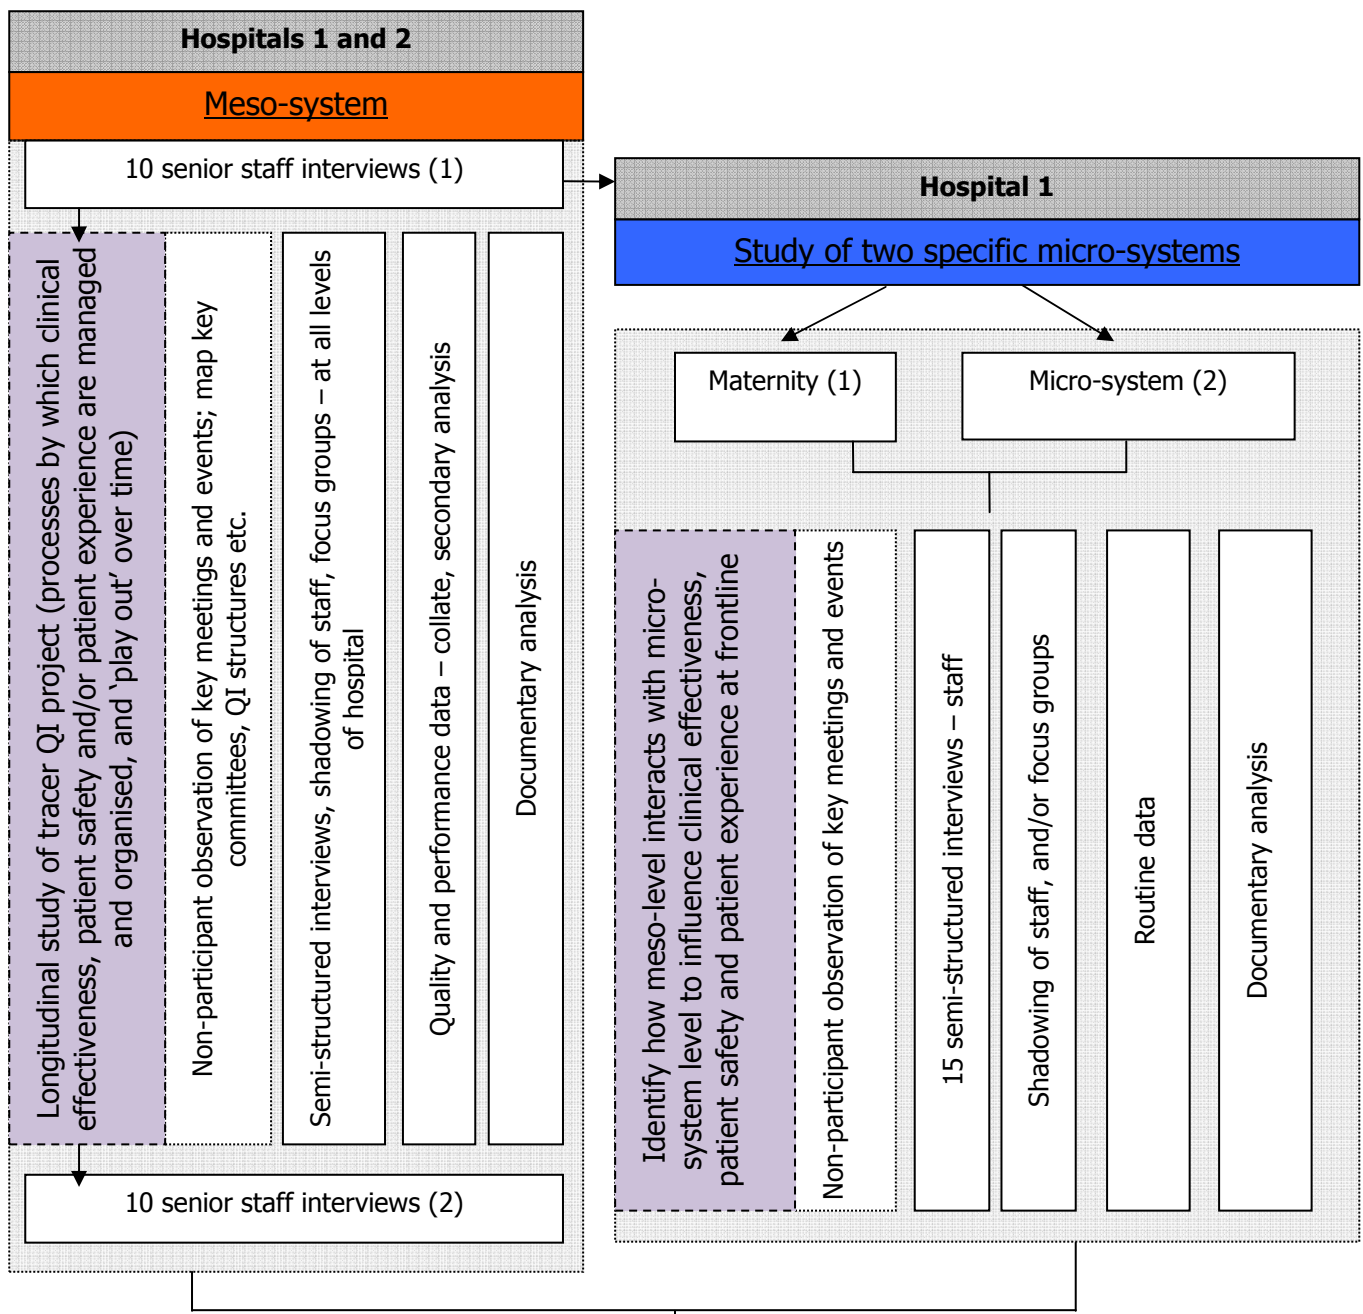

## Analysis

Written report on multi-level case studies using agreed template and framework; cross-case analysis
